# Supplementary material
Source: publisher figshare collection journal article supplement (https://acs.figshare.com/ndownloader/files/22082310)
Supplement: Supplementary file 1 [file 22082310]

*Supporting Information*

# Ligand-Assisted Solid-State Transformation of Nanoparticles

*Bo Li<sup>[a][b]</sup>, Jinxing Chen<sup>[a][d]</sup>, Lili Han<sup>[c]</sup>, Qingsong Fan<sup>[a]</sup>, Chaolumen Wu<sup>[a]</sup>, Xiaojing*

*Wang<sup>[a]</sup>, Michael Lee<sup>[a]</sup>, Huolin L. Xin<sup>[c]</sup>, Zhiwu Han<sup>[b]</sup>, Yadong Yin<sup>[a],\*</sup>*

<sup>[a]</sup> Department of Chemistry, University of California Riverside, Riverside, CA 92521,  
USA

<sup>[b]</sup> Key Laboratory of Bionic Engineering (Ministry of Education, China), Jilin University,  
Changchun, Jilin 130022, P. R. China

<sup>[c]</sup> Department of Physics and Astronomy, University of California Irvine, Irvine, CA  
92697, USA

<sup>[d]</sup> Institute of Functional Nano & Soft Materials (FUNSOM), Jiangsu Key Laboratory for Carbon-Based Functional Materials & Devices, Soochow University, Suzhou, Jiangsu 215123, P.R. China

\* Corresponding Author.

E-mail address: [yadong.yin@ucr.edu](mailto:yadong.yin@ucr.edu). Fax: +1-951-827-4713

**Synthesis of  $\beta$ -FeOOH ellipsoids.**<sup>1</sup> The synthesis of  $\beta$ -FeOOH ellipsoids is based on a previously reported method with minor revisions. 0.2 M  $\text{FeCl}_3 \cdot 6\text{H}_2\text{O}$  and 10 g CTAC were dissolved in 100 ml water. Then, the solution was transferred into a 250 mL narrow-necked bottle and was heated at 87 °C for 24 hours. The final product was washed with water 3 times and collected by centrifugation. At last, the precipitate was dispersed in 25 mL of water.

**Synthesis of  $\beta$ -FeOOH nanorods.**<sup>2</sup> 0.1M  $\text{FeCl}_3 \cdot 6\text{H}_2\text{O}$  was dissolved in 400 mL distilled water. Then the solution was heated at 60 °C for 4 days. In the initial stage of the heating process, the temperature rises at a rate of 0.2 °C·min<sup>-1</sup> until it rises to 60 °C. The product was removed by centrifugation and washed with water twice and then dispersed in 25 mL water for future use.

**Synthesis of Prussian blue nanocubes.**<sup>3</sup> The synthesis followed a previously reported method. 113.14 mg potassium ferricyanide and 3 g of PVP (Mw.40,000) were added to a 40 mL 0.1 M HCl solution. After stirring at room temperature for 30 min, the system was heated at 80°C for 20 hours. The blue product was then collected by centrifugation and dispersed in 25 mL water for future use.

**Synthesis of  $\text{Co}(\text{OH})_2$  nanoplates.**<sup>4</sup>  $\text{Co}(\text{OH})_2$  nanoplates were synthesized based on a previous report with some modifications. Typically, 0.48 g of  $\text{CoCl}_2$  was dissolved in 0.2 g of PVP (Mw=55,000) and 72 mL of  $\text{H}_2\text{O}$ , followed by adding 0.56 g of hexamethylenetetramine and 8 mL of ethanol. The mixture was heated at 95 °C for 2 h. The products were collected by centrifugation, washed with  $\text{H}_2\text{O}$  and redispersed in 40 mL of  $\text{H}_2\text{O}$ .

**Synthesis of  $\text{Ni}(\text{OH})_2$  nanoplates.**<sup>5</sup> To synthesize the 50 nm  $\text{Ni}(\text{OH})_2$  nanoplates, an aqueous solution of 10 mol·mL<sup>-1</sup>  $\text{Ni}(\text{NO}_3)_2$  and 20 mol·mL<sup>-1</sup>  $\text{NH}_3 \cdot \text{H}_2\text{O}$  was heated in an oven at 90°C for 2 hours. And then the solution was washed with water several times and dispersed in 25 mL water for the next step.

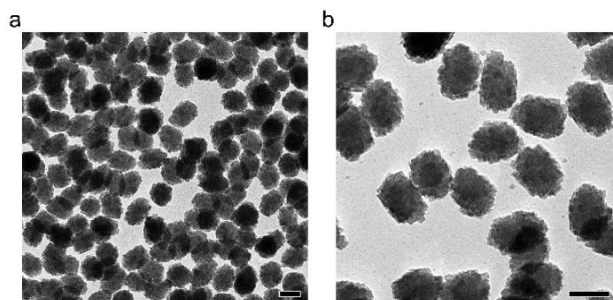

**Figure S1.** TEM images of the original  $\beta$ -FeOOH ellipsoids. Scale bars: 100 nm.

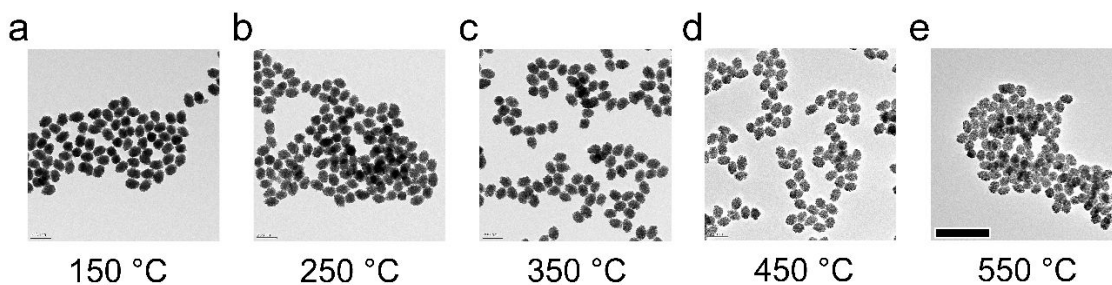

**Figure S2.** TEM images of the PAA-modified  $\beta$ -FeOOH ellipsoids calcined at various temperatures for 2h. Scale bar: 500 nm.

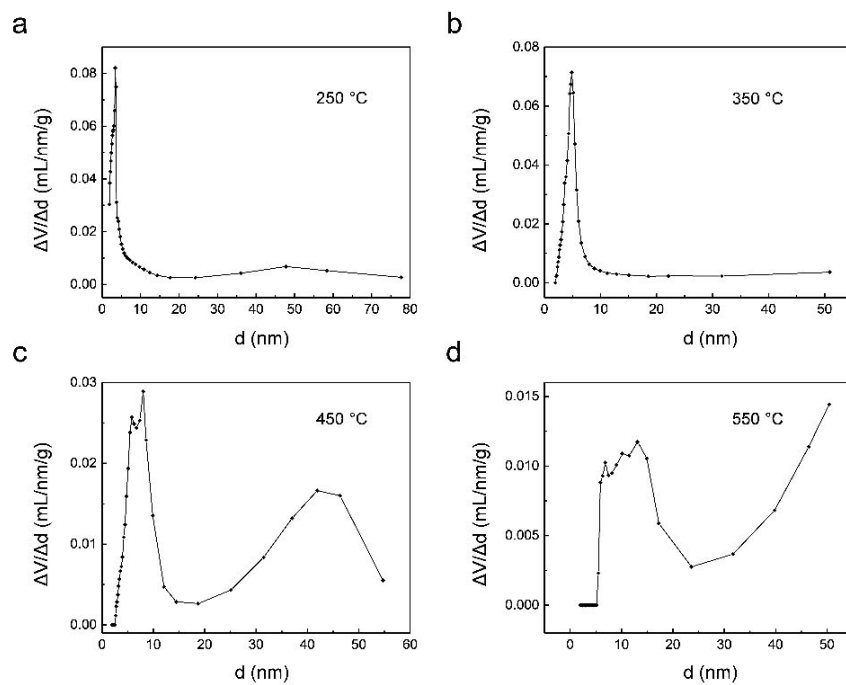

**Figure S3.** Pore size distribution curves of PAA-modified  $\beta$ -FeOOH ellipsoids calcined at various temperatures for 2h.

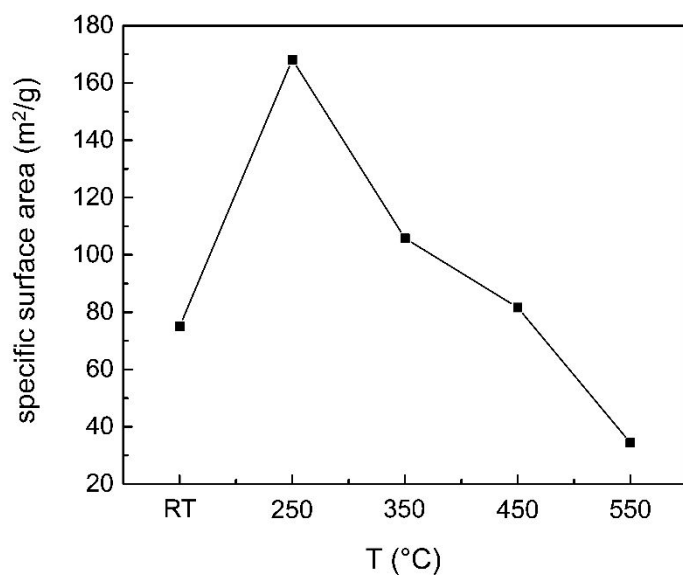

**Figure S4.** Specific surface area of the original  $\beta$ -FeOOH ellipsoids and the samples calcined in air at various temperatures for 2h.

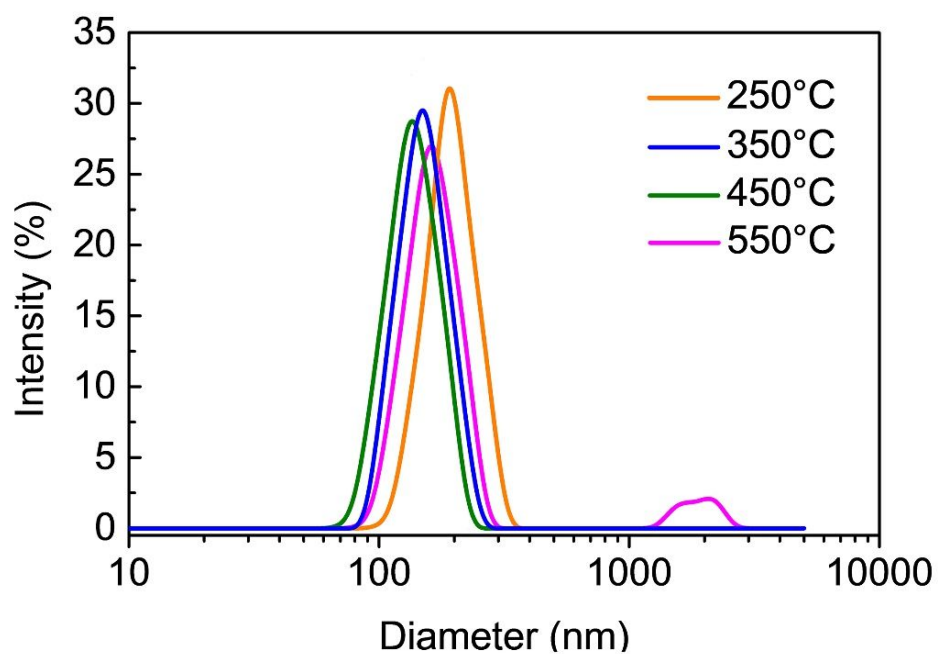

**Figure S5.** The size distributions of PAA-modified ellipsoids calcined for 2h at 250 °C, 350 °C, 450 °C and 550 °C.

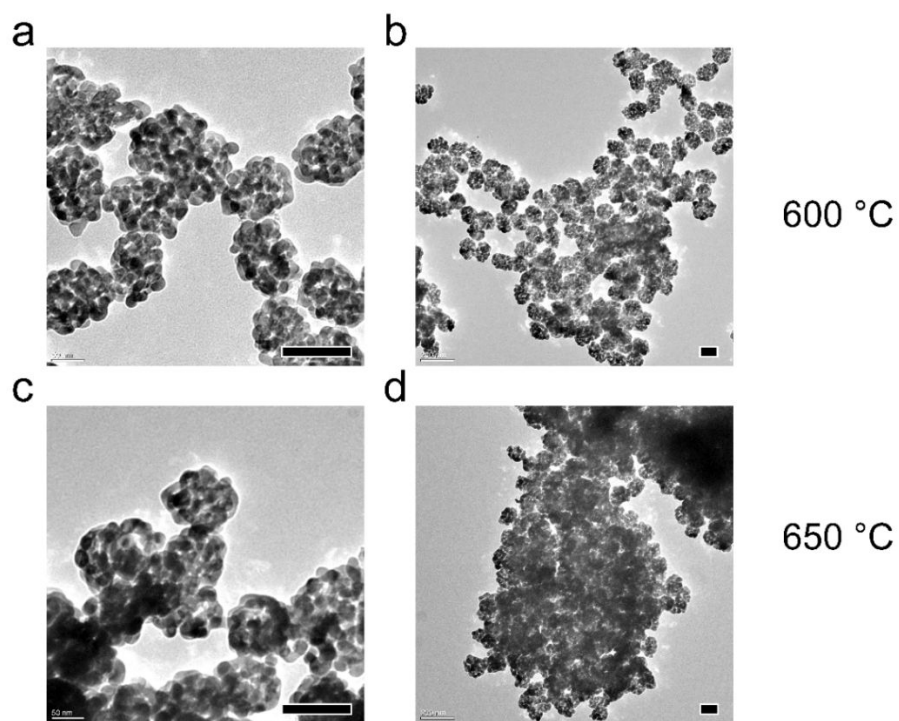

**Figure S6.** Morphologies of the  $\beta$ -FeOOH ellipsoids calcined at 600 °C (**a** and **b**) and 650 °C (**c** and **d**) for 2h. Scale bars: 100 nm.

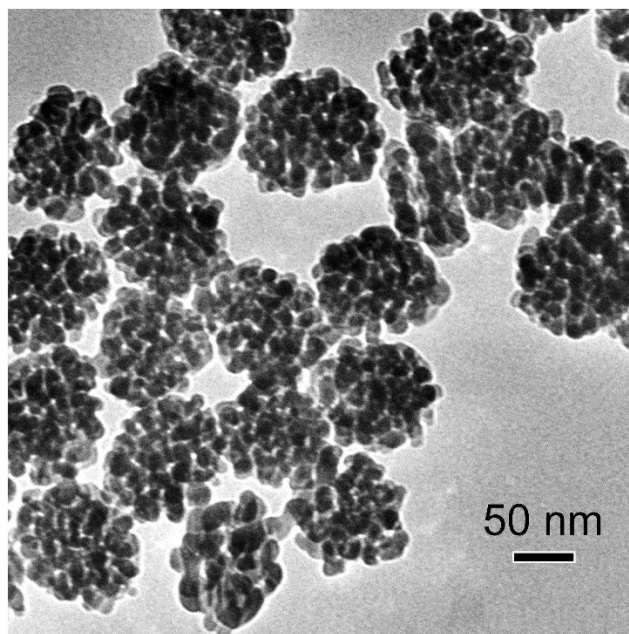

**Figure S7.** TEM image of the  $\text{Fe}_2\text{O}_3$  ellipsoids with a secondary PAA modification calcined in air at 550 °C for 2h.

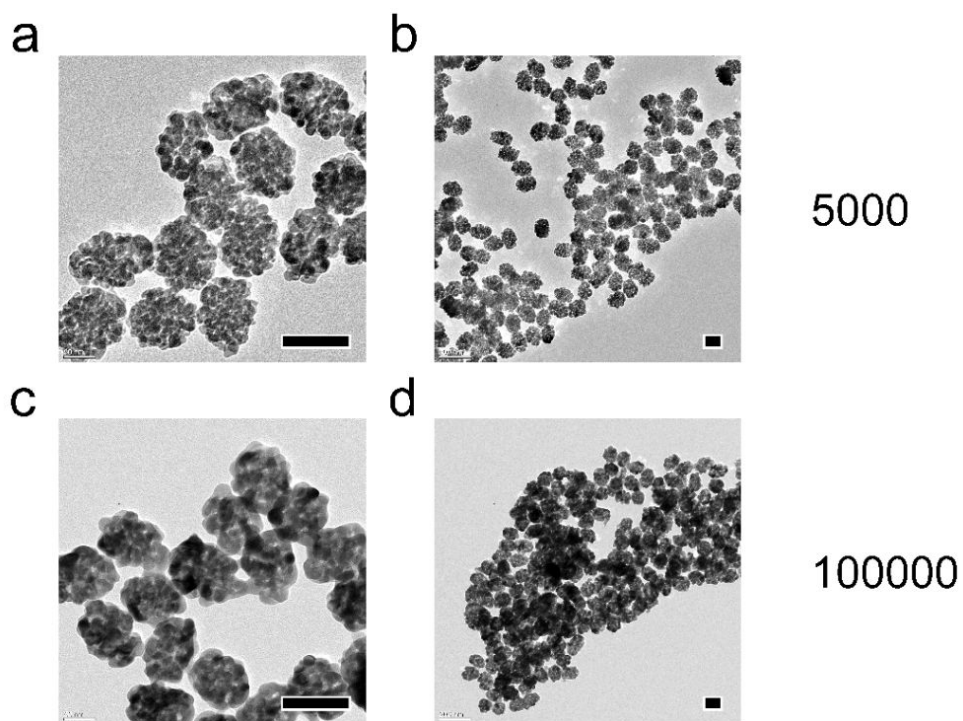

**Figure S8.** PAA with a molecular weight of 5000 (**a** and **b**) and 100,000 (**c** and **d**) were used to modify the FeOOH ellipsoids. Then these nanoparticles were calcined at 600 °C for 2h. Scale bars: 100 nm.

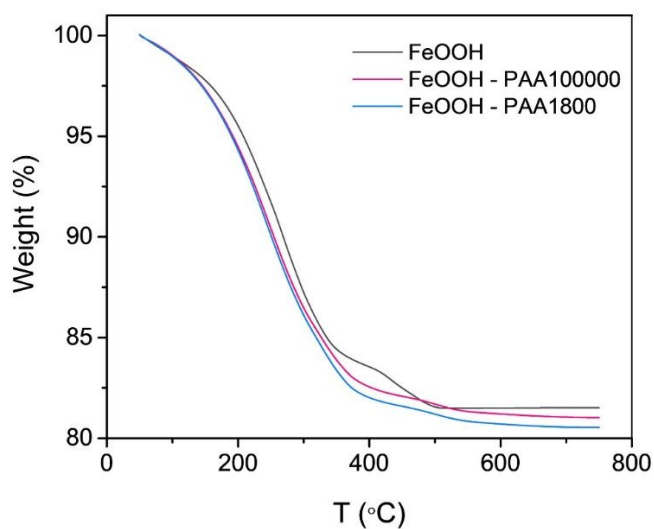

**Figure S9.** TGA measurements of FeOOH ellipsoids and FeOOH ellipsoids modified by PAA with molecular weight of 1800 and 100000.

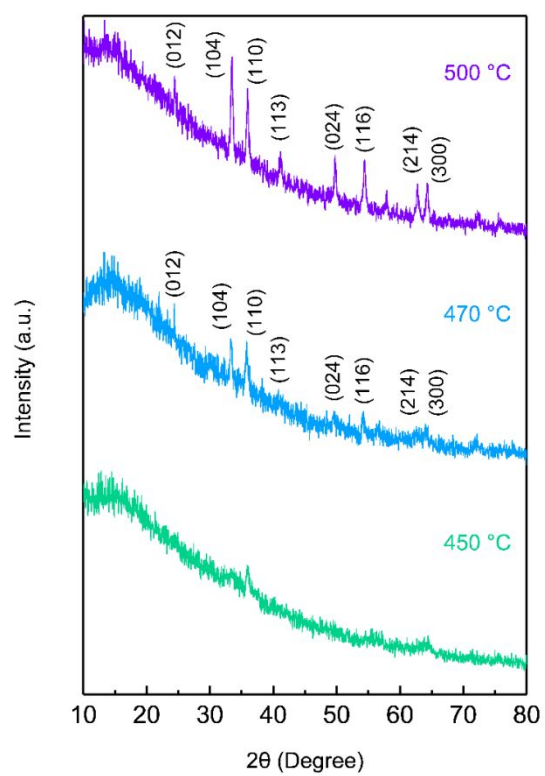

**Figure S10.** XRD patterns of PAA-modified  $\beta$ -FeOOH ellipsoids calcined at 450 °C, 470 °C, and 500 °C.

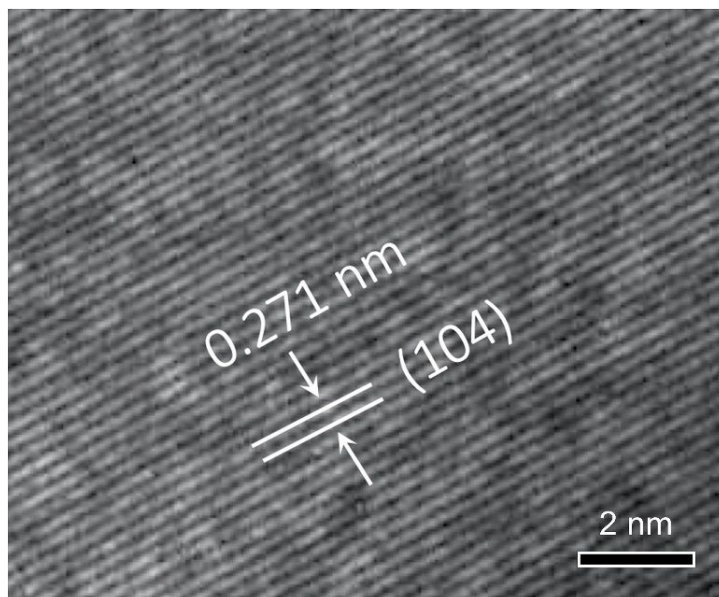

**Figure S11.** HRTEM image of  $\text{Fe}_2\text{O}_3$  ellipsoids.



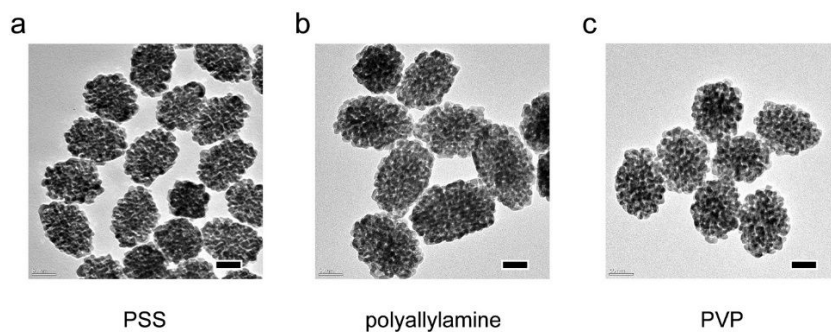

**Figure S12.**  $\beta$ -FeOOH ellipsoids were modified by PSS (a), polyallylamine (b) and PVP (c) and then calcined at 350 °C for 2h. Scale bars: 50 nm.

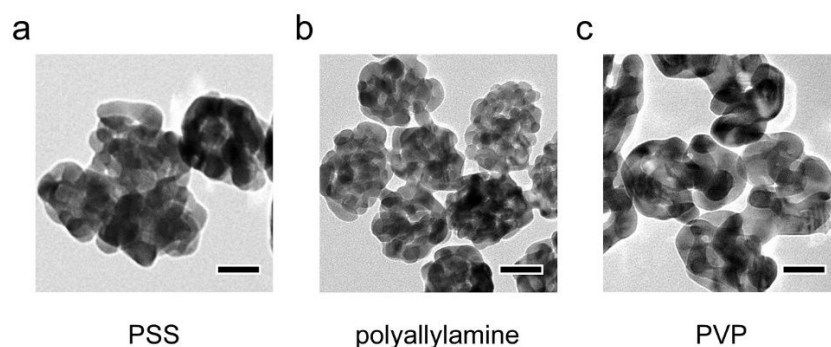

**Figure S13.**  $\beta$ -FeOOH ellipsoids were modified by PSS (a), polyallylamine (b) and PVP (c) and then calcined at 550 °C for 2h. Scale bars: 50 nm.

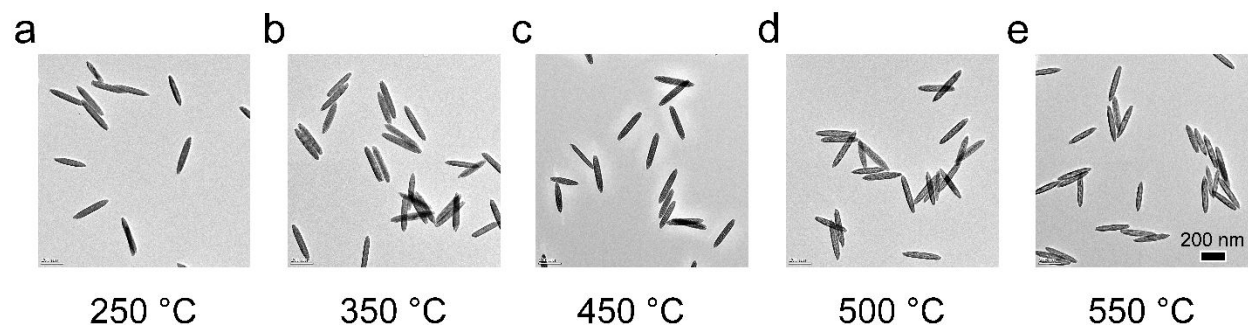

**Figure S14.** The morphology evolution of the  $\beta$ -FeOOH rods after calcination for two hours at a gradient temperature from 250 °C to 550 °C with an interval of 100 °C.

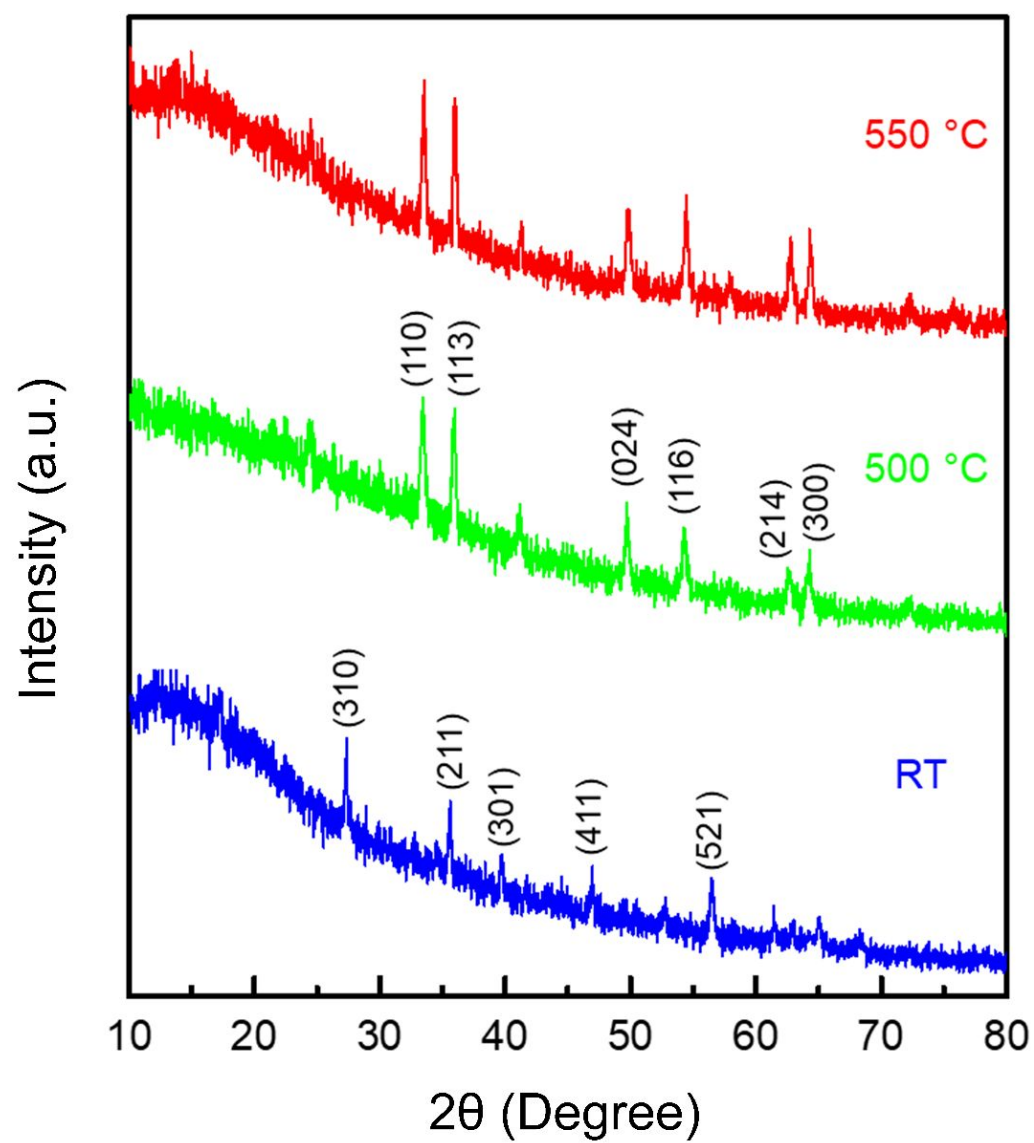

**Figure S15.** XRD patterns of PAA-modified  $\beta$ -FeOOH rods and the samples calcined at 500 °C and 550 °C.

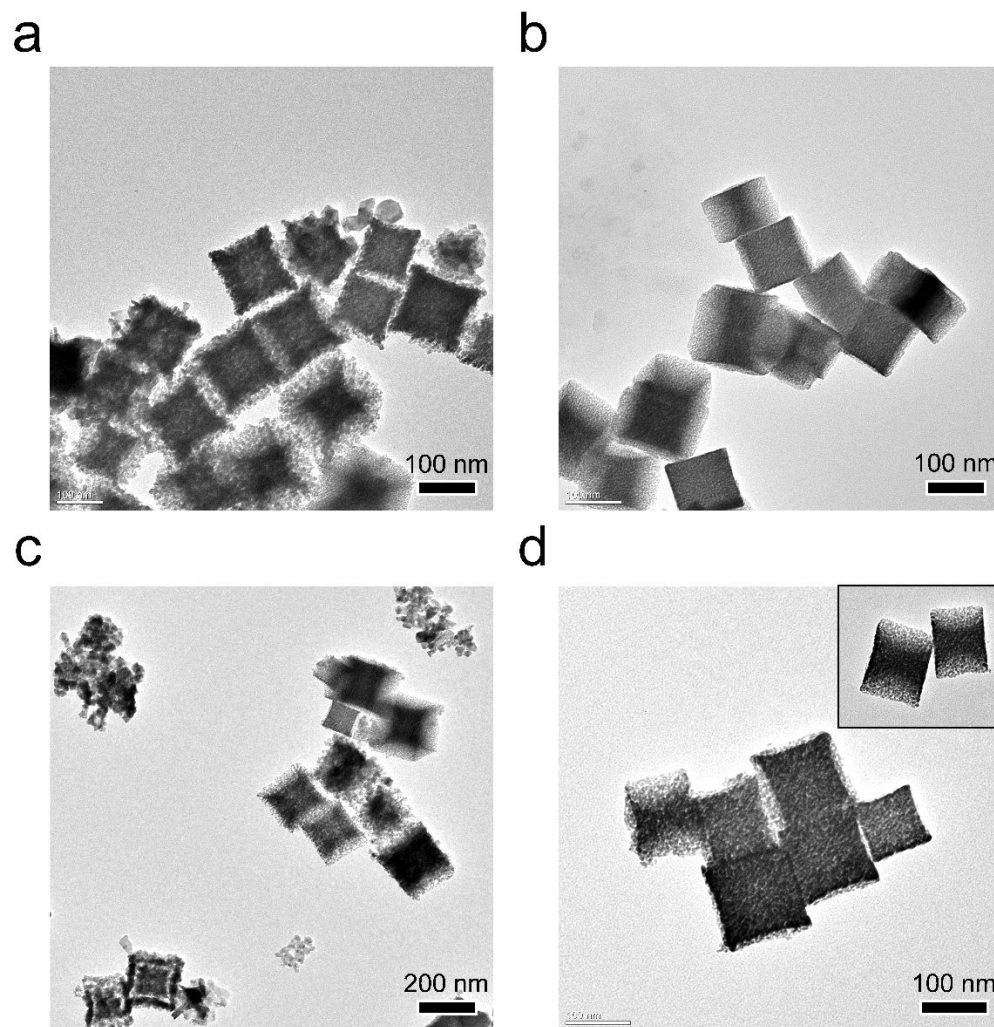

**Figure S16.** **a** and **c** are TEM images of original PB nanocubes calcined at 250 °C and 350 °C, respectively. PB nanocubes capped with PAA were also heated at 250 °C (**b**) and 350 °C (**d**).

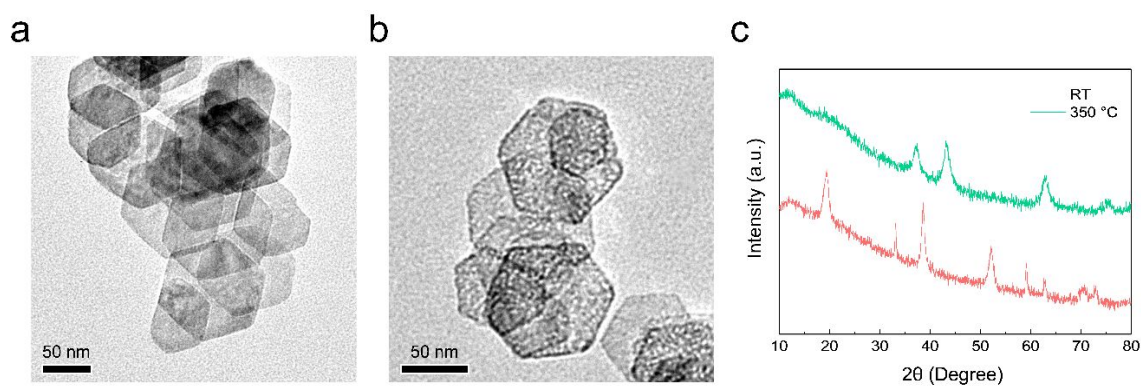

**Figure S17.** Morphology of PAA-modified Ni(OH)<sub>2</sub> nanoplates before (**a**) and after (**b**) calcination at 350 °C for 2h. **c**, XRD patterns of PAA-modified Ni(OH)<sub>2</sub> nanoplates annealed at 350 °C.

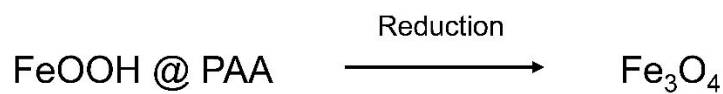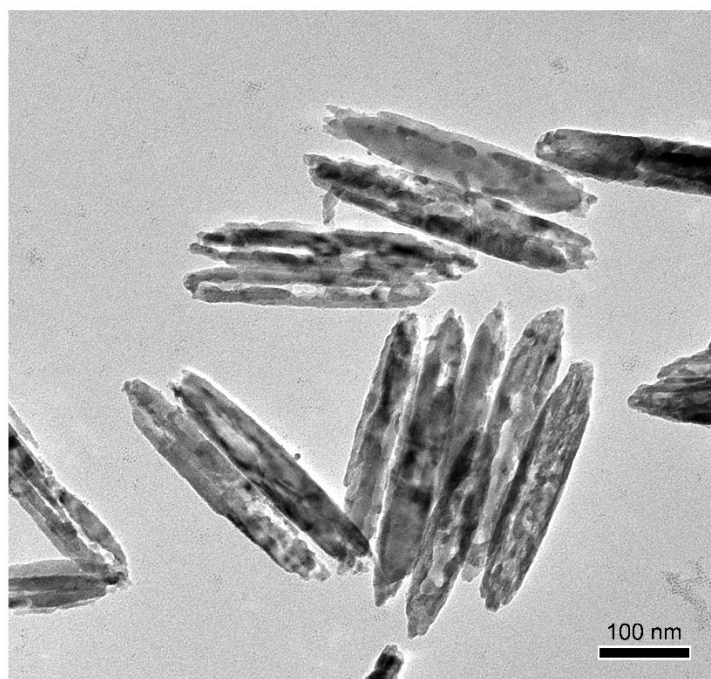

**Figure S18.** Direct reduction of PAA-modified FeOOH rods in forming gas at 330 °C for 2h.

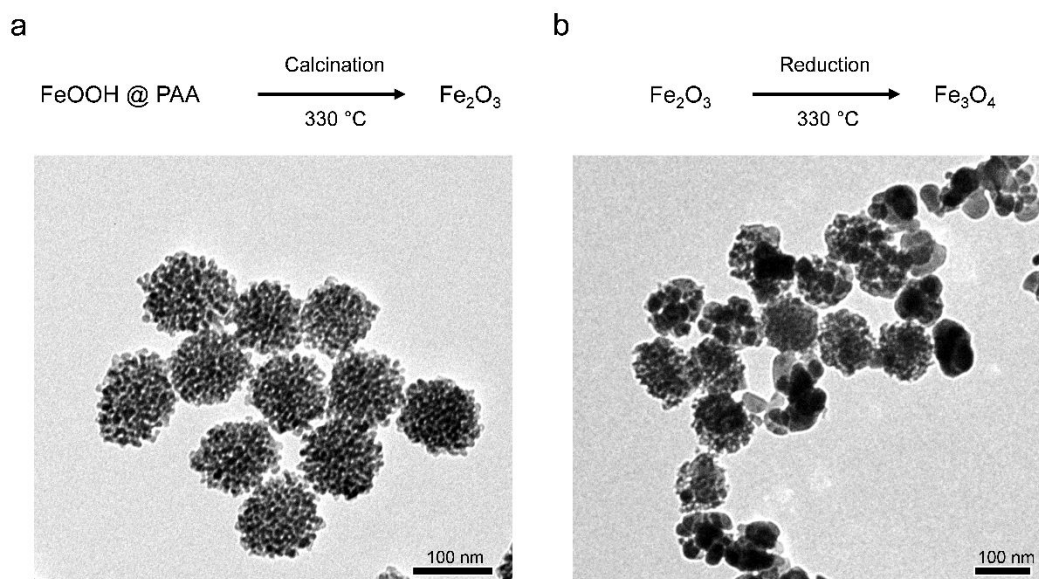

**Figure S19.** PAA-modified FeOOH ellipsoids were heated in air at 330 °C for 2h. Then the obtained nanoparticles (**a**) were reduced in forming gas directly without a secondary PAA modification (**b**).

## References:

1. Wang, M.; He, L.; Xu, W.; Wang, X.; Yin, Y. *Angew Chem Int Ed Engl* **2015**, 54, (24), 7077-81.
2. Maeda, Y.; Hachisu, S. *Colloids and Surfaces* **1983**, 6, (1), 1-16.
3. Hu, M.; Furukawa, S.; Ohtani, R.; Sukegawa, H.; Nemoto, Y.; Reboul, J.; Kitagawa, S.; Yamauchi, Y. *Angew Chem Int Ed Engl* **2012**, 51, (4), 984-8.
4. Liu, Z.; Ma, R.; Osada, M.; Takada, K.; Sasaki, T. *J Am Chem Soc* **2005**, 127, (40), 13869-74.
5. Durand-Keklikian, L.; Haq, I.; Matijević, E. *Colloids and Surfaces A: Physicochemical and Engineering Aspects* **1994**, 92, (3), 267-275.
